# Supplementary material for: Polygenic Risk and Episode Polarity Among Individuals With Bipolar Disorder
Source: Atypon-hosted journal article supplement (doi:10.1176/appi.ajp.22010003), 2023-01-18

## CONTENTS

|                                                                                                                                                                           |    |
|---------------------------------------------------------------------------------------------------------------------------------------------------------------------------|----|
| Abbreviations .....                                                                                                                                                       | 2  |
| Table S1. Polarity as defined by ICD-10 diagnosis.....                                                                                                                    | 3  |
| Table S2. Individual associations between PRS and number of manic and depressive episodes.....                                                                            | 4  |
| Table S3. Pearson Correlations between PRS variables.....                                                                                                                 | 4  |
| Table S4. PRS and number of manic and depressive episodes with and without psychotic symptoms .....                                                                       | 4  |
| Table S5. PRS and polarity and the first or any episode among 2,366 patients with bipolar disorder who had Danish-born parents .....                                      | 5  |
| Table S6. PRS and number of episodes of a given polarity among 2,366 patients with bipolar disorder who had Danish-born parents .....                                     | 5  |
| Table S7. PRS and psychotic symptoms in the first or any manic or depressive episode among 2,366 patients with bipolar disorder who had Danish-born parents.....          | 6  |
| Table S8. PRS and number of manic and depressive episodes with and without psychotic symptoms among 2,366 patients with bipolar disorder who had Danish-born parents..... | 6  |
| Table S9. PRS and polarity at the first or any episode during the 3-year period following initial diagnosis .....                                                         | 7  |
| Table S10. PRS and number of episodes of a given polarity during the 3-year period following initial diagnosis.....                                                       | 7  |
| Table S11. PRS and psychotic symptoms in the first or any manic or depressive episode during the 3-year period following initial diagnosis. ....                          | 8  |
| Table S12. PRS and number of manic and depressive episodes with and without psychotic symptoms during the 3-year period following initial diagnosis .....                 | 8  |
| Figure S1. Sample Selection Flow Chart.....                                                                                                                               | 9  |
| Figure S2. Individual associations between polygenic liabilities for bipolar disorder, schizophrenia and major depression and polarity and first or any episode .....     | 10 |
| Figure S3. Individual Associations between polygenic liabilities for bipolar disorder, schizophrenia, and major depression and psychotic symptoms .....                   | 11 |
| Figure S4. Mean PRS by number of episodes of a given polarity.....                                                                                                        | 12 |

## Abbreviations

Lcl = lower confidence limit

OR = odds ratio

PRS = polygenic risk score

PRS-BD = Polygenic risk score for bipolar disorder

PRS-MD = Polygenic risk score for major depression

PRS-SZ = Polygenic risk score for schizophrenia

Ucl = upper confidence limit

P = p value

Table S1. Polarity as defined by ICD-10 diagnosis

| Polarity                 | ICD-10 Code    | Code description                                                                        |
|--------------------------|----------------|-----------------------------------------------------------------------------------------|
| Depressive               | F31.3          | Bipolar disorder, current episode mild or moderate depression                           |
|                          | F31.4          | Bipolar disorder, current episode severe depression without psychotic symptoms          |
|                          | F31.5          | Bipolar disorder, current episode severe depression with psychotic symptoms             |
|                          | F32.x<br>F33.x | Depressive episode<br>Recurrent depressive disorder                                     |
| Manic                    | F30.x          | Manic episode                                                                           |
|                          | F31.0          | Bipolar disorder, current episode hypomanic                                             |
|                          | F31.1          | Bipolar disorder, current episode manic without psychotic symptoms                      |
|                          | F31.2          | Bipolar disorder, current episode manic with psychotic symptoms                         |
| Mixed                    | F31.6          | Bipolar disorder, current episode mixed                                                 |
|                          | F38.00         | Mixed affective episode                                                                 |
| Unspecified              | F31.7          | Bipolar disorder currently in remission                                                 |
|                          | F31.9          | Bipolar disorder not otherwise specified                                                |
| Non-psychotic depression | F31.3          | Bipolar disorder, current episode mild or moderate depression                           |
|                          | F31.4          | Bipolar disorder, current episode severe depression without psychotic symptoms          |
|                          | F32 (excl. .3) | Depressive episode, excluding severe depressive episode with psychotic symptoms         |
|                          | F33 (excl. .3) | Recurrent depressive disorder, excluding current episode severe with psychotic symptoms |
| Psychotic depression     | F31.5          | Bipolar disorder, current episode severe depression with psychotic symptoms             |
|                          | F32.3          | Severe depressive episode with psychotic symptoms                                       |
|                          | F33.3          | Recurrent depressive disorder, current episode severe with psychotic symptoms           |
| Non-psychotic mania      | F30 (exc. .2)  | Manic episode, excluding severe with psychotic symptoms                                 |
|                          | F31.0          | Bipolar disorder, current episode hypomanic                                             |
|                          | F31.1          | Bipolar disorder, current episode manic without psychotic symptoms                      |
| Psychotic mania          | F30.2          | Manic episode, severe with psychotic symptoms                                           |
|                          | F31.2          | Bipolar disorder, current episode manic with psychotic symptoms                         |

Note. Episodes where the diagnosis was F31.8- 'Other bipolar affective disorders' were excluded, as this category includes different polarities and could therefore not be properly placed within a polarity category.

Table S2. Individual associations between PRS and number of manic and depressive episodes

| Polarity    | Polygenic Risk Score |      |        |                  |      |        |               |      |        |
|-------------|----------------------|------|--------|------------------|------|--------|---------------|------|--------|
|             | Bipolar Disorder     |      |        | Major Depression |      |        | Schizophrenia |      |        |
|             | $\beta$              | SE   | p      | $\beta$          | SE   | p      | $\beta$       | SE   | p      |
| Depressive  | 0.02                 | 0.02 | 0.5176 | 0.04             | 0.02 | 0.0615 | 0.01          | 0.02 | 0.5525 |
| Manic       | 0.24                 | 0.04 | <.0001 | -0.18            | 0.04 | <.0001 | 0.18          | 0.05 | <.0001 |
| Mixed       | 0.05                 | 0.05 | 0.2653 | 0.11             | 0.05 | 0.0173 | 0.09          | 0.05 | 0.0711 |
| Unspecified | 0.03                 | 0.02 | 0.1348 | -0.00            | 0.02 | 0.8671 | 0.03          | 0.02 | 0.2576 |

Note. Associations obtained from negative binomial models with the exception of the association between PRS-MD and unspecified polarity, which was obtained from a poisson regression model. All models adjusted for gender, age at first bipolar diagnosis, the first 5 principal components and genotyping platform (iPSYCH2012 vs. iPSYCH2015).

Table S3. Pearson Correlations between PRS variables

|                      | PRS-schizophrenia   | PRS-bipolar disorder | PRS-major depression |
|----------------------|---------------------|----------------------|----------------------|
| PRS-schizophrenia    | 1.00                | -                    | -                    |
| PRS-bipolar disorder | 0.51915 (p < .0001) | 1.00                 | -                    |
| PRS-major depression | 0.25304 (p < .0001) | 0.25246 (p < .0001)  | 1.00                 |

Table S4. PRS and number of manic and depressive episodes with and without psychotic symptoms

| Polarity   |                       | Polygenic Risk Score |      |        |                  |      |        |               |      |        |
|------------|-----------------------|----------------------|------|--------|------------------|------|--------|---------------|------|--------|
|            |                       | Bipolar Disorder     |      |        | Major Depression |      |        | Schizophrenia |      |        |
|            |                       | $\beta$              | SE   | p      | $\beta$          | SE   | p      | $\beta$       | SE   | p      |
| Any        | Psychotic symptoms    | 0.15                 | 0.07 | 0.0294 | -0.32            | 0.06 | <.0001 | 0.22          | 0.07 | 0.0032 |
| Depression | No psychotic symptoms | 0.01                 | 0.03 | 0.8432 | 0.06             | 0.02 | 0.0168 | -0.00         | 0.03 | 0.8561 |
|            | Psychotic symptoms    | 0.02                 | 0.11 | 0.8410 | -0.20            | 0.10 | 0.0399 | 0.12          | 0.11 | 0.3091 |
| Mania      | No psychotic symptoms | 0.20                 | 0.05 | 0.0002 | -0.18            | 0.05 | 0.0001 | 0.08          | 0.05 | 0.1537 |
|            | Psychotic symptoms    | 0.27                 | 0.09 | 0.0035 | -0.42            | 0.08 | <.0001 | 0.29          | 0.09 | 0.0023 |

Note. Associations obtained from negative binomial models. All models adjusted for gender, age at first bipolar diagnosis, the first 5 principal components and genotyping platform (iPSYCH2012 vs. iPSYCH2015).

Table S5. PRS and polarity and the first or any episode among 2,366 patients with bipolar disorder who had Danish-born parents

| Polarity    | PRS    | First episode |      |      |        | Any episode |      |      |        |
|-------------|--------|---------------|------|------|--------|-------------|------|------|--------|
|             |        | OR            | lcl  | ucl  | p      | OR          | lcl  | ucl  | p      |
| Depressive  | PRS-BD | 0.97          | 0.87 | 1.08 | 0.5761 | 0.94        | 0.84 | 1.06 | 0.3275 |
|             | PRS-MD | 1.10          | 1.00 | 1.21 | 0.0487 | 1.14        | 1.02 | 1.26 | 0.0162 |
|             | PRS-SZ | 0.94          | 0.85 | 1.05 | 0.2890 | 1.00        | 0.88 | 1.12 | 0.9390 |
| Manic       | PRS-BD | 1.15          | 0.99 | 1.34 | 0.0607 | 1.27        | 1.12 | 1.44 | 0.0002 |
|             | PRS-MD | 0.82          | 0.72 | 0.93 | 0.0019 | 0.77        | 0.69 | 0.86 | <.0001 |
|             | PRS-SZ | 1.14          | 0.99 | 1.33 | 0.0773 | 1.13        | 0.99 | 1.28 | 0.0613 |
| Mixed       | PRS-BD | 0.82          | 0.68 | 0.98 | 0.0341 | 0.99        | 0.87 | 1.13 | 0.8419 |
|             | PRS-MD | 1.26          | 1.07 | 1.48 | 0.0058 | 1.14        | 1.02 | 1.28 | 0.0223 |
|             | PRS-SZ | 1.07          | 0.89 | 1.28 | 0.4905 | 1.03        | 0.90 | 1.18 | 0.6380 |
| Unspecified | PRS-BD | 1.03          | 0.91 | 1.16 | 0.6426 | 0.95        | 0.85 | 1.06 | 0.3349 |
|             | PRS-MD | 0.93          | 0.84 | 1.03 | 0.1584 | 0.95        | 0.86 | 1.05 | 0.3547 |
|             | PRS-SZ | 0.96          | 0.85 | 1.08 | 0.4609 | 1.00        | 0.90 | 1.12 | 0.9682 |

Note. Associations obtained from logistic regression models adjusted for gender, age at first bipolar diagnosis, the first 5 principal components and genotyping platform (iPSYCH2012 vs. iPSYCH2015).

Table S6. PRS and number of episodes of a given polarity among 2,366 patients with bipolar disorder who had Danish-born parents

| Polarity    | Polygenic Risk Score |      |        |                  |      |        |               |      |        |
|-------------|----------------------|------|--------|------------------|------|--------|---------------|------|--------|
|             | Bipolar Disorder     |      |        | Major Depression |      |        | Schizophrenia |      |        |
|             | $\beta$              | SE   | p      | $\beta$          | SE   | p      | $\beta$       | SE   | p      |
| Depressive  | -0.00                | 0.03 | 0.9525 | 0.04             | 0.03 | 0.1133 | 0.01          | 0.03 | 0.7601 |
| Manic       | 0.24                 | 0.05 | <.0001 | -0.24            | 0.05 | <.0001 | 0.14          | 0.05 | 0.0097 |
| Mixed       | 0.02                 | 0.06 | 0.7207 | 0.10             | 0.05 | 0.0559 | 0.06          | 0.06 | 0.3262 |
| Unspecified | 0.03                 | 0.03 | 0.2641 | -0.02            | 0.02 | 0.4327 | 0.02          | 0.03 | 0.5794 |

Note. Associations obtained from negative binomial models with the exception of the association between PRS-MD and unspecified polarity, which was obtained from a poisson regression model. All models adjusted for gender, age at first bipolar diagnosis, the first 5 principal components and genotyping platform (iPSYCH2012 vs. iPSYCH2015).

Table S7. PRS and psychotic symptoms in the first or any manic or depressive episode among 2,366 patients with bipolar disorder who had Danish-born parents

| Polarity   | Psychosis (yes/no)    | PRS    | First episode |      |      |        | Any episode |      |      |        |
|------------|-----------------------|--------|---------------|------|------|--------|-------------|------|------|--------|
|            |                       |        | OR            | lci  | ucl  | p      | OR          | lci  | ucl  | p      |
| Any        | Psychotic symptoms    | PRS-BD | 1.09          | 0.87 | 1.35 | 0.4574 | 1.23        | 1.04 | 1.45 | 0.0176 |
|            |                       | PRS-MD | 0.74          | 0.62 | 0.90 | 0.0019 | 0.66        | 0.57 | 0.76 | <.0001 |
|            |                       | PRS-SZ | 1.31          | 1.05 | 1.63 | 0.0172 | 1.19        | 1.00 | 1.41 | 0.0476 |
| Depression | No psychotic symptoms | PRS-BD | 0.98          | 0.88 | 1.09 | 0.7216 | 0.94        | 0.84 | 1.06 | 0.3089 |
|            |                       | PRS-MD | 1.12          | 1.02 | 1.23 | 0.0204 | 1.15        | 1.03 | 1.27 | 0.0100 |
|            |                       | PRS-SZ | 0.92          | 0.83 | 1.03 | 0.1355 | 0.99        | 0.88 | 1.11 | 0.8475 |
|            | Psychotic symptoms    | PRS-BD | 0.88          | 0.60 | 1.27 | 0.4817 | 1.00        | 0.79 | 1.27 | 0.9886 |
|            |                       | PRS-MD | 0.83          | 0.60 | 1.14 | 0.2542 | 0.79        | 0.64 | 0.97 | 0.0217 |
|            |                       | PRS-SZ | 1.33          | 0.91 | 1.94 | 0.1432 | 1.05        | 0.82 | 1.33 | 0.7013 |
| Mania      | No psychotic symptoms | PRS-BD | 1.12          | 0.94 | 1.32 | 0.2064 | 1.25        | 1.09 | 1.43 | 0.0014 |
|            |                       | PRS-MD | 0.88          | 0.76 | 1.02 | 0.0974 | 0.82        | 0.73 | 0.92 | 0.0007 |
|            |                       | PRS-SZ | 1.07          | 0.91 | 1.27 | 0.4107 | 1.07        | 0.93 | 1.23 | 0.3241 |
|            | Psychotic symptoms    | PRS-BD | 1.19          | 0.92 | 1.54 | 0.1781 | 1.36        | 1.11 | 1.67 | 0.0030 |
|            |                       | PRS-MD | 0.72          | 0.57 | 0.90 | 0.0035 | 0.63        | 0.53 | 0.76 | <.0001 |
|            |                       | PRS-SZ | 1.28          | 0.98 | 1.66 | 0.0649 | 1.29        | 1.05 | 1.59 | 0.0156 |

Note. Associations obtained from logistic regression models adjusted for gender, age at first bipolar diagnosis, the first 5 principal components and genotyping platform (iPSYCH2012 vs. iPSYCH2015).

Table S8. PRS and number of manic and depressive episodes with and without psychotic symptoms among 2,366 patients with bipolar disorder who had Danish-born parents

| Polarity   | Psychosis (yes/no)    | Polygenic Risk Score |      |        |                  |      |        |               |      |        |
|------------|-----------------------|----------------------|------|--------|------------------|------|--------|---------------|------|--------|
|            |                       | Bipolar Disorder     |      |        | Major Depression |      |        | Schizophrenia |      |        |
|            |                       | $\beta$              | SE   | p      | $\beta$          | SE   | p      | $\beta$       | SE   | p      |
| Any        | Psychotic symptoms    | 0.17                 | 0.08 | 0.0237 | -0.32            | 0.07 | <.0001 | 0.21          | 0.08 | 0.0090 |
| Depression | No psychotic symptoms | -0.00                | 0.03 | 0.9322 | 0.06             | 0.03 | 0.0229 | 0.00          | 0.03 | 0.9347 |
|            | Psychotic symptoms    | 0.01                 | 0.12 | 0.9361 | -0.21            | 0.10 | 0.0414 | 0.11          | 0.12 | 0.3769 |
| Mania      | No psychotic symptoms | 0.22                 | 0.06 | 0.0001 | -0.17            | 0.05 | 0.0006 | 0.09          | 0.06 | 0.1221 |
|            | Psychotic symptoms    | 0.32                 | 0.10 | 0.0018 | -0.43            | 0.09 | <.0001 | 0.29          | 0.10 | 0.0052 |

Note. Associations obtained from negative binomial models. All models adjusted for gender, age at first bipolar diagnosis, the first 5 principal components and genotyping platform (iPSYCH2012 vs. iPSYCH2015).

Table S9. PRS and polarity at the first or any episode during the 3-year period following initial diagnosis

| Polarity    | PRS    | First episode |      |      |        | Any episode |      |      |        |
|-------------|--------|---------------|------|------|--------|-------------|------|------|--------|
|             |        | OR            | lcl  | ucl  | p      | OR          | lcl  | ucl  | p      |
| Depressive  | PRS-BD | 0.99          | 0.88 | 1.11 | 0.8622 | 1.01        | 0.89 | 1.15 | 0.8746 |
|             | PRS-MD | 1.10          | 1.00 | 1.22 | 0.0550 | 1.14        | 1.02 | 1.27 | 0.0244 |
|             | PRS-SZ | 0.96          | 0.85 | 1.07 | 0.4482 | 0.89        | 0.79 | 1.01 | 0.0775 |
| Manic       | PRS-BD | 1.10          | 0.94 | 1.29 | 0.2257 | 1.17        | 1.01 | 1.34 | 0.0328 |
|             | PRS-MD | 0.76          | 0.67 | 0.88 | 0.0001 | 0.72        | 0.63 | 0.81 | <.0001 |
|             | PRS-SZ | 1.17          | 0.99 | 1.37 | 0.0648 | 1.23        | 1.06 | 1.42 | 0.0053 |
| Mixed       | PRS-BD | 0.78          | 0.62 | 0.97 | 0.0272 | 0.95        | 0.80 | 1.12 | 0.5396 |
|             | PRS-MD | 1.46          | 1.12 | 1.78 | 0.0002 | 1.24        | 1.07 | 1.43 | 0.0037 |
|             | PRS-SZ | 1.00          | 0.78 | 1.25 | 0.9908 | 0.92        | 0.78 | 1.09 | 0.3359 |
| Unspecified | PRS-BD | 1.04          | 0.91 | 1.19 | 0.5431 | 1.00        | 0.88 | 1.12 | 0.9392 |
|             | PRS-MD | 0.92          | 0.82 | 1.04 | 0.1873 | 0.94        | 0.85 | 1.05 | 0.2699 |
|             | PRS-SZ | 0.95          | 0.83 | 1.09 | 0.4878 | 1.05        | 0.93 | 1.19 | 0.3975 |

Note. Only the subset of patients with at least 3 years in follow-up were included in these analyses (n=1926). Associations obtained from logistic regression models adjusted for gender, age at first bipolar diagnosis, the first 5 principal components and genotyping platform (iPSYCH2012 vs. iPSYCH2015).

Table S10. PRS and number of episodes of a given polarity during the 3-year period following initial diagnosis

| Polarity    | Polygenic Risk Score |      |        |                  |      |        |               |      |        |
|-------------|----------------------|------|--------|------------------|------|--------|---------------|------|--------|
|             | Bipolar Disorder     |      |        | Major Depression |      |        | Schizophrenia |      |        |
|             | $\beta$              | SE   | p      | $\beta$          | SE   | p      | $\beta$       | SE   | p      |
| Depressive  | 0.02                 | 0.03 | 0.4836 | 0.05             | 0.03 | 0.0515 | -0.04         | 0.03 | 0.1799 |
| Manic       | 0.18                 | 0.06 | 0.0020 | -0.25            | 0.05 | <.0001 | 0.18          | 0.06 | 0.0019 |
| Mixed       | 0.04                 | 0.07 | 0.5766 | 0.16             | 0.06 | 0.0130 | -0.09         | 0.07 | 0.2479 |
| Unspecified | 0.03                 | 0.03 | 0.2641 | -0.02            | 0.02 | 0.4327 | 0.02          | 0.03 | 0.5794 |

Note. Only the subset of patients with at least 3 years in follow-up were included in these analyses (n=1926). Associations obtained from negative binomial models except for depressive polarity, which was obtained from a poisson regression model. All models adjusted for gender, age at first bipolar diagnosis, the first 5 principal components and genotyping platform (iPSYCH2012 vs. iPSYCH2015).

Table S11. PRS and psychotic symptoms in the first or any manic or depressive episode during the 3-year period following initial diagnosis.

| Polarity   | Psychosis (yes/no)    | PRS    | First episode |      |      |        | Any episode |      |      |        |
|------------|-----------------------|--------|---------------|------|------|--------|-------------|------|------|--------|
|            |                       |        | OR            | lcl  | ucl  | p      | OR          | lcl  | ucl  | p      |
| Any        | Psychotic symptoms    | PRS-BD | 1.10          | 0.87 | 1.38 | 0.4370 | 1.19        | 0.99 | 1.44 | 0.0595 |
|            |                       | PRS-MD | 0.81          | 0.66 | 0.99 | 0.0353 | 0.70        | 0.60 | 0.83 | <.0001 |
|            |                       | PRS-SZ | 1.27          | 1.00 | 1.61 | 0.0523 | 1.17        | 0.96 | 1.41 | 0.1117 |
| Depression | No psychotic symptoms | PRS-BD | 0.99          | 0.88 | 1.11 | 0.8961 | 1.02        | 0.90 | 1.15 | 0.8121 |
|            |                       | PRS-MD | 1.12          | 1.01 | 1.23 | 0.0336 | 1.13        | 1.01 | 1.26 | 0.0267 |
|            |                       | PRS-SZ | 0.94          | 0.84 | 1.06 | 0.2992 | 0.98        | 0.79 | 1.01 | 0.0780 |
|            | Psychotic symptoms    | PRS-BD | 0.98          | 0.65 | 1.48 | 0.9230 | 1.06        | 0.81 | 1.41 | 0.6607 |
|            |                       | PRS-MD | 0.86          | 0.61 | 1.22 | 0.3962 | 0.89        | 0.71 | 1.14 | 0.3749 |
|            |                       | PRS-SZ | 1.26          | 0.83 | 1.93 | 0.2784 | 0.97        | 0.73 | 1.29 | 0.8189 |
| Mania      | No psychotic symptoms | PRS-BD | 1.07          | 0.89 | 1.29 | 0.4536 | 1.15        | 0.99 | 1.34 | 0.0675 |
|            |                       | PRS-MD | 0.78          | 0.66 | 0.91 | 0.0020 | 0.77        | 0.67 | 0.88 | 0.0001 |
|            |                       | PRS-SZ | 1.11          | 0.92 | 1.33 | 0.2881 | 1.22        | 1.04 | 1.43 | 0.0129 |
|            | Psychotic symptoms    | PRS-BD | 1.14          | 0.87 | 1.50 | 0.3296 | 1.27        | 1.01 | 1.58 | 0.0367 |
|            |                       | PRS-MD | 0.79          | 0.62 | 1.00 | 0.0471 | 0.66        | 0.54 | 0.80 | <.0001 |
|            |                       | PRS-SZ | 1.26          | 0.95 | 1.68 | 0.1056 | 1.25        | 1.00 | 1.58 | 0.0522 |

Note. Only the subset of patients with at least 3 years in follow-up were included in these analyses (n=1926). Associations obtained from logistic regression models adjusted for gender, age at first bipolar diagnosis, the first 5 principal components and genotyping platform (iPSYCH2012 vs. iPSYCH2015).

Table S12. PRS and number of manic and depressive episodes with and without psychotic symptoms during the 3-year period following initial diagnosis

| Polarity   | Psychosis (yes/no)    | Polygenic Risk Score |      |        |                  |      |        |               |      |        |
|------------|-----------------------|----------------------|------|--------|------------------|------|--------|---------------|------|--------|
|            |                       | Bipolar Disorder     |      |        | Major Depression |      |        | Schizophrenia |      |        |
|            |                       | $\beta$              | SE   | p      | $\beta$          | SE   | p      | $\beta$       | SE   | p      |
| Any        | Psychotic symptoms    | 0.20                 | 0.08 | 0.0144 | -0.25            | 0.07 | 0.0003 | 0.18          | 0.08 | 0.0311 |
| Depression | No psychotic symptoms | 0.02                 | 0.03 | 0.6146 | 0.06             | 0.03 | 0.0203 | -0.05         | 0.03 | 0.1290 |
|            | Psychotic symptoms    | 0.10                 | 0.13 | 0.4439 | -0.11            | 0.12 | 0.3390 | 0.06          | 0.14 | 0.6708 |
| Mania      | No psychotic symptoms | 0.13                 | 0.06 | 0.0356 | -0.20            | 0.05 | 0.0002 | 0.15          | 0.06 | 0.0220 |
|            | Psychotic symptoms    | 0.28                 | 0.11 | 0.0073 | -0.35            | 0.09 | 0.0001 | 0.27          | 0.11 | 0.0146 |

Note. Only the subset of patients with at least 3 years in follow-up were included in these analyses (n=1926). Associations obtained from negative binomial models. All models adjusted for gender, age at first bipolar diagnosis, the first 5 principal components and genotyping platform (iPSYCH2012 vs. iPSYCH2015).



Figure S1. Sample Selection Flow Chart

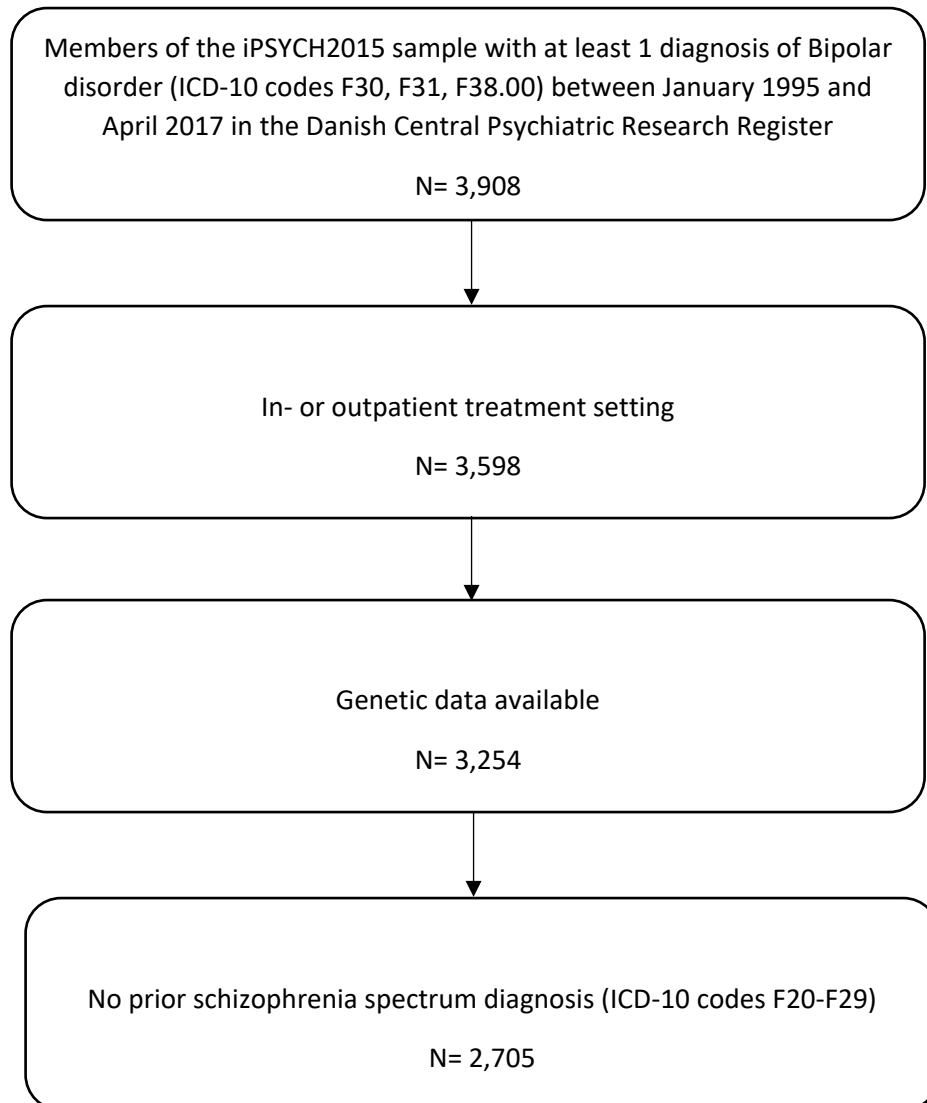

Figure S2. Individual associations between polygenic liabilities for bipolar disorder, schizophrenia and major depression and polarity and first or any episode

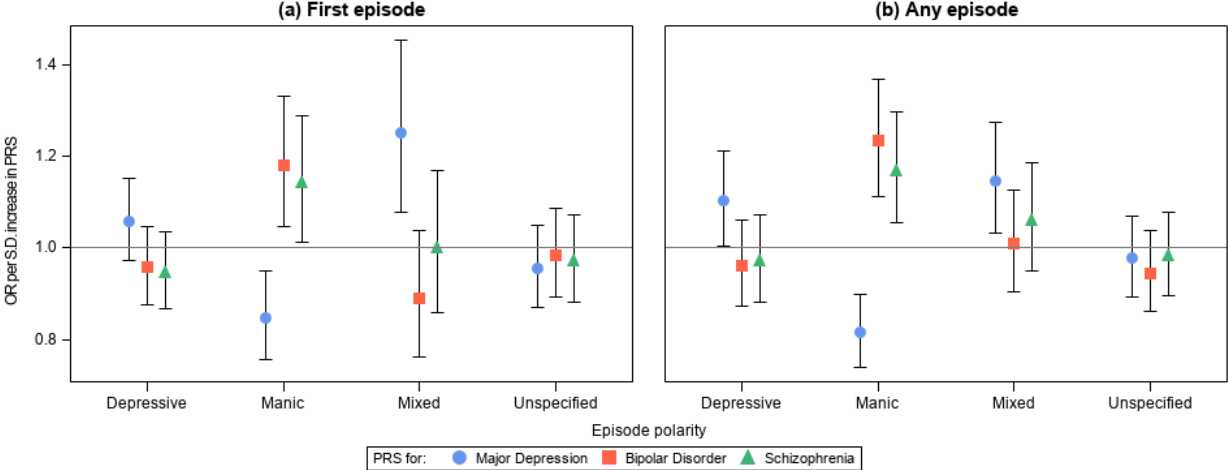

Note. Associations obtained from logistic regression models. All models adjusted for the first 5 principal components and genotyping platform (iPSYCH2012 vs. iPSYCH2015).

Figure S3. Individual Associations between polygenic liabilities for bipolar disorder, schizophrenia, and major depression and psychotic symptoms

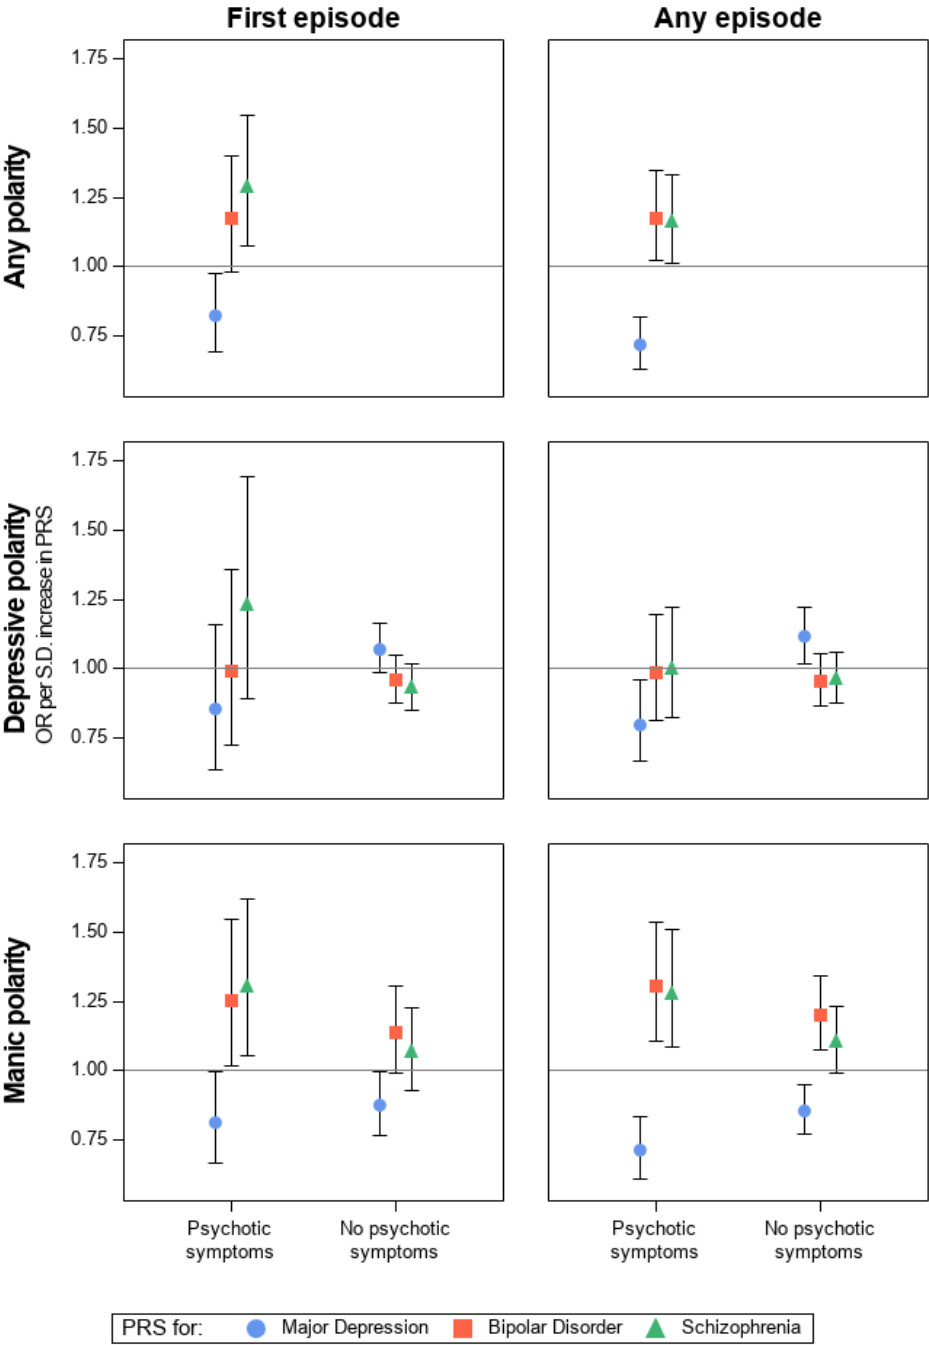

Note. Associations obtained from logistic regression models. All models adjusted for the first 5 principal components and genotyping platform (iPSYCH2012 vs. iPSYCH2015).

Figure S4. Mean PRS by number of episodes of a given polarity

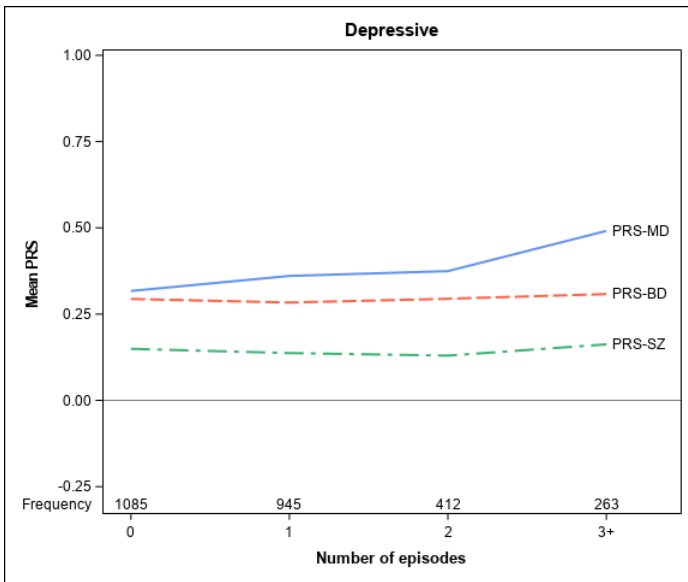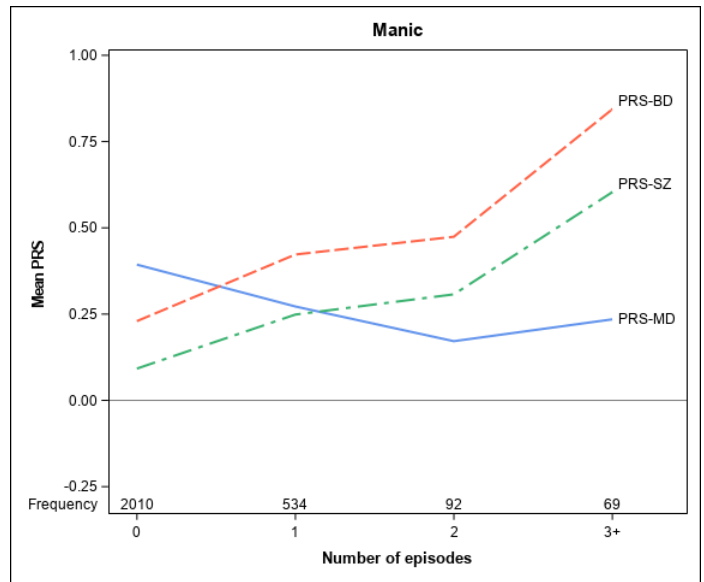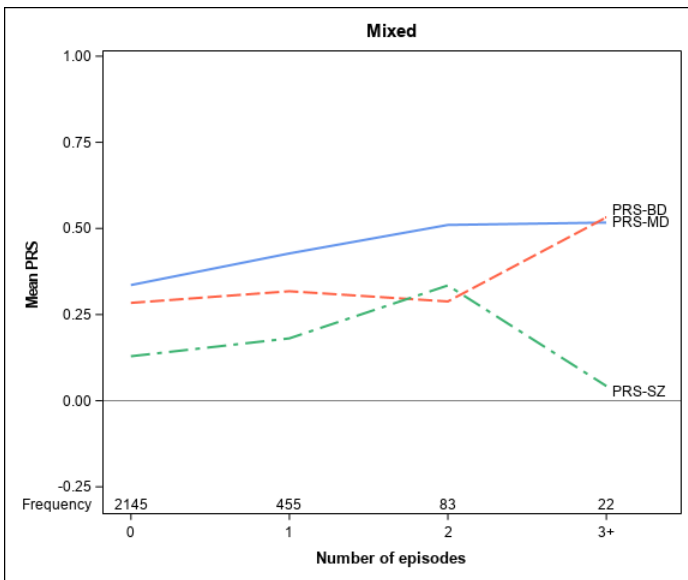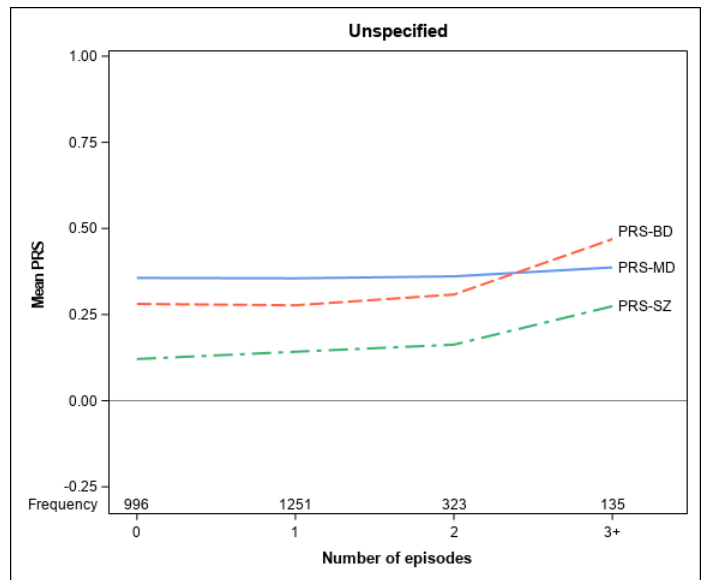

Supplement: appi.ajp.22010003.ds001.pdf [file appi.ajp.22010003.ds001.pdf]
